# Supplementary material for: Differences between germline and somatic mutation rates in humans and mice
Source: PubMed Central journal article supplement (PMC5436103; doi:10.1038/ncomms15183), 2017-05-09
Supplement: ncomms15183-s1.pdf [file ncomms15183-s1.pdf]

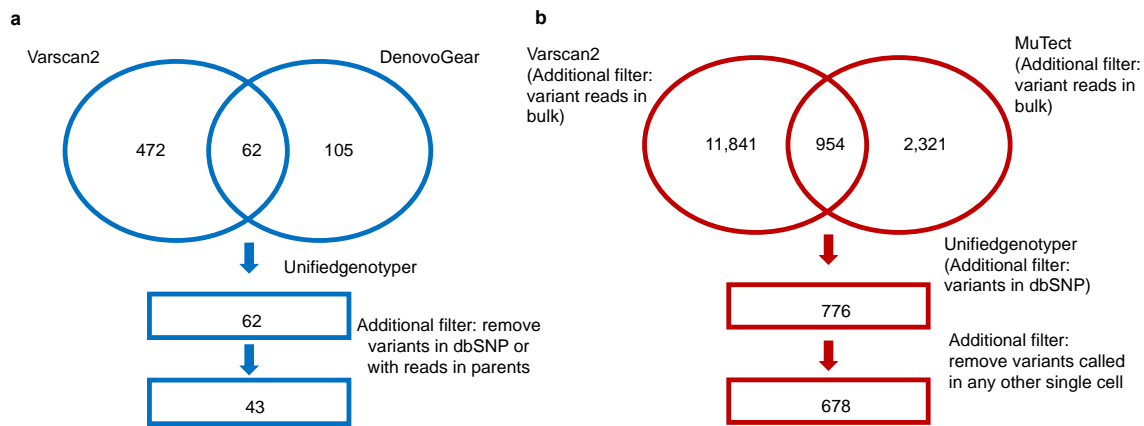

1

2 **Supplementary Fig. 1.** Detailed examples of mutation calling. **(a)** Germline mutation  
 3 calling for sample F1. Only mutations found by both VarScan2 and DenovoGear were  
 4 considered. Furthermore, variants not found by the GATK UnifiedGenotyper, present in  
 5 dbSNP, or with variant-supporting reads in the parents were excluded. **(b)** Somatic  
 6 mutation calling for sample MS.ice1. Only mutations bound by both VarScan2 and  
 7 MuTect were considered. Furthermore, variants not found by the GATK  
 8 UnifiedGenotyper, present in dbSNP or with variant-supporting reads in the bulk were  
 9 excluded.

10

11

12 **Supplementary Table 1. Summary of data sources**

| Sample ID  | Species | Family ID | Sample Type                   | Source                  |
|------------|---------|-----------|-------------------------------|-------------------------|
| BM1452.001 | Human   | hm01      | Child                         | 10.1002/humu.22814      |
| BM1452.100 | Human   | hm01      | Parent                        | 10.1002/humu.22814      |
| BM1452.200 | Human   | hm01      | Parent                        | 10.1002/humu.22814      |
| BM1453.001 | Human   | hm02      | Child                         | 10.1002/humu.22814      |
| BM1453.100 | Human   | hm02      | Parent                        | 10.1002/humu.22814      |
| BM1453.200 | Human   | hm02      | Parent                        | 10.1002/humu.22814      |
| HS.clone1  | Human   |           | Cloned dermal fibroblast      | Dong, et. al., in press |
| HS.clone2  | Human   |           | Cloned dermal fibroblast      | Dong, et. al., in press |
| HS.clone3  | Human   |           | Cloned dermal fibroblast      | Dong, et. al., in press |
| HS.h24     | Human   |           | Dermal fibroblast single cell | Dong, et. al., in press |
| HS.h25     | Human   |           | Dermal fibroblast single cell | Dong, et. al., in press |
| HS.h2c     | Human   |           | Cloned dermal fibroblast      | Dong, et. al., in press |
| HS.hdfcon1 | Human   |           | Dermal fibroblast single cell | Dong, et. al., in press |
| HS.hdfcon2 | Human   |           | Dermal fibroblast single cell | Dong, et. al., in press |
| HS.hdf2    | Human   |           | Dermal fibroblast single cell | Dong, et. al., in press |
| HS.hdf3    | Human   |           | Dermal fibroblast single cell | Dong, et. al., in press |
| MS.ice1    | Mouse   |           | Dermal fibroblast single cell | new dataset             |
| MS.ice2    | Mouse   |           | Dermal fibroblast single cell | new dataset             |
| MS.ice3    | Mouse   |           | Dermal fibroblast single cell | new dataset             |
| MS.mdfcon1 | Mouse   |           | Dermal fibroblast single cell | new dataset             |
| MS.mdfcon2 | Mouse   |           | Dermal fibroblast single cell | new dataset             |
| L906F      | Mouse   | mm01      | Parent                        | new dataset             |
| L913M      | Mouse   | mm01      | Parent                        | new dataset             |
| M1         | Mouse   | mm01      | Child                         | new dataset             |
| F1         | Mouse   | mm01      | Child                         | new dataset             |
| NC_2       | Mouse   | mm02      | Parent                        | 10.1038/ncomms7684      |
| NC_PF3     | Mouse   | mm02      | Parent                        | 10.1038/ncomms7684      |
| NC_231     | Mouse   | mm02      | Child                         | 10.1038/ncomms7684      |
| NC_232     | Mouse   | mm02      | Child                         | 10.1038/ncomms7684      |
| NC_233     | Mouse   | mm02      | Child                         | 10.1038/ncomms7684      |
| NC_3       | Mouse   | mm03      | Parent                        | 10.1038/ncomms7684      |
| NC_PF5     | Mouse   | mm03      | Parent                        | 10.1038/ncomms7684      |
| NC_351     | Mouse   | mm03      | Child                         | 10.1038/ncomms7684      |
| NC_354     | Mouse   | mm03      | Child                         | 10.1038/ncomms7684      |
| NC_358     | Mouse   | mm03      | Child                         | 10.1038/ncomms7684      |

13 Additional mutations from ref.<sup>14</sup>, consisting of 10 sets of *de novo* mutations are excluded from this and the  
14 following tables as the mutations were taken from the paper and not generated bioinformatically.

15 **Supplementary Table 2. Sequencing statistics**

| Sample ID  | Average depth | Bases > 20x in both single cell and bulk / parents and offspring |
|------------|---------------|------------------------------------------------------------------|
| HS.h24     | 26.5          | 1,648,051,466                                                    |
| HS.h25     | 26.9          | 1,465,262,548                                                    |
| HS.h2c     | 31.6          | 2,522,012,564                                                    |
| HS.HB      | 43.9          | -                                                                |
| HS.hdfcon1 | 26.3          | 1,733,263,437                                                    |
| HS.hdfcon2 | 27.1          | 1,597,245,602                                                    |
| HS.hdf2    | 17.9          | 1,077,893,888                                                    |
| HS.hdf3    | 17.8          | 1,031,274,980                                                    |
| HS.clone1  | 29.5          | 2,513,956,859                                                    |
| HS.clone2  | 33.6          | 2,620,916,003                                                    |
| HS.clone3  | 27.6          | 2,452,906,052                                                    |
| MS.ice1    | 28.8          | 1,417,524,845                                                    |
| MS.ice2    | 29.4          | 1,353,229,979                                                    |
| MS.ice3    | 27.0          | 1,314,225,173                                                    |
| MS.mdfcon1 | 26.0          | 1,497,205,575                                                    |
| MS.mdfcon2 | 24.3          | 1,175,345,676                                                    |
| MS.mb      | 45.8          | -                                                                |
| L913M      | 45.4          | -                                                                |
| L906F      | 47.8          | -                                                                |
| M1         | 45.2          | 2,324,972,805                                                    |
| F1         | 42.5          | 2,337,145,060                                                    |
| NC_2       | 23.1          | -                                                                |
| NC_Pf3     | 28.0          | -                                                                |
| NC_231     | 23.7          | 1,635,675,992                                                    |
| NC_232     | 24.2          | 1,630,125,166                                                    |
| NC_233     | 23.9          | 1,621,709,947                                                    |
| NC_3       | 21.2          | -                                                                |
| NC_Pf5     | 20.5          | -                                                                |
| NC_351     | 20.8          | 1,193,732,118                                                    |
| NC_354     | 22.0          | 1,227,069,432                                                    |
| NC_358     | 14.9          | 502,891,925                                                      |
| BM1452.001 | 28.5          | 2,081,722,080                                                    |
| BM1452.100 | 26.8          | -                                                                |
| BM1452.200 | 28.1          | -                                                                |
| BM1453.001 | 28.2          | 2,159,675,380                                                    |
| BM1453.100 | 27.2          | -                                                                |
| BM1453.200 | 27.7          | -                                                                |

17

18 **Supplementary Table 3. Results of Sanger sequencing**

| Sample        | # callers reporting variant | Confirmed | Sequenced | % Confirmed |
|---------------|-----------------------------|-----------|-----------|-------------|
| Human-clone1  | 3                           | 3         | 3         | 100         |
| Human-clone2  | 3                           | 1         | 1         | 100         |
| Human-h24     | 3                           | 12        | 12        | 100         |
| Human-h25     | 3                           | 9         | 11        | 81.8        |
|               | 1                           | 1         | 10        | 10          |
| Human-hdf2    | 2                           | 4         | 13        | 30.8        |
|               | 3                           | 2         | 2         | 100         |
| Human-hdf3    | 3                           | 4         | 4         | 100         |
| Mouse-ice1    | 1                           | 0         | 14        | 0           |
|               | 2                           | 0         | 12        | 0           |
|               | 1                           | 0         | 12        | 0           |
| Mouse-trio-F1 | 2                           | 0         | 10        | 0           |
|               | 3                           | 8         | 10        | 80          |
| Mouse-trio-M1 | 3                           | 13        | 18        | 72.2        |

19

20

21 **Supplementary Table 4. Estimates of mutation frequency and rate**

| Sample     | Type* | Species† | Mutations called | Bases    | TPR¶ | FDR‡ | Estimated mitoses | Mutation frequency | Mutation rate |
|------------|-------|----------|------------------|----------|------|------|-------------------|--------------------|---------------|
| ice1       | S     | M        | 678              | 1.42E+09 | 0.43 | 0.3  | 55.0              | 3.9E-07            | 7.1E-09       |
| ice2       | S     | M        | 933              | 1.35E+09 | 0.43 | 0.3  | 55.0              | 5.6E-07            | 1.0E-08       |
| ice3       | S     | M        | 729              | 1.31E+09 | 0.43 | 0.3  | 55.0              | 4.5E-07            | 8.2E-09       |
| mdfcon1    | S     | M        | 681              | 1.50E+09 | 0.43 | 0.3  | 55.0              | 3.7E-07            | 6.7E-09       |
| mdfcon2    | S     | M        | 641              | 1.18E+09 | 0.43 | 0.3  | 55.0              | 4.4E-07            | 8.1E-09       |
| F1         | G     | M        | 43               | 2.30E+09 | 1    | 0.25 | 56.0              | 7.0E-09            | 1.3E-10       |
| M1         | G     | M        | 41               | 2.29E+09 | 1    | 0.25 | 56.0              | 6.7E-09            | 1.2E-10       |
| nc-231     | G     | M        | 28               | 1.64E+09 | 1    | 0.25 | 56.0              | 6.4E-09            | 1.1E-10       |
| nc-232     | G     | M        | 32               | 1.63E+09 | 1    | 0.25 | 56.0              | 7.4E-09            | 1.3E-10       |
| nc-233     | G     | M        | 29               | 1.62E+09 | 1    | 0.25 | 56.0              | 6.7E-09            | 1.2E-10       |
| nc-351     | G     | M        | 16               | 1.19E+09 | 1    | 0.25 | 56.0              | 5.0E-09            | 9.0E-11       |
| nc-354     | G     | M        | 16               | 1.23E+09 | 1    | 0.25 | 56.0              | 4.9E-09            | 8.7E-11       |
| nc-358     | G     | M        | 2                | 5.03E+08 | 1    | 0.25 | 56.0              | 1.5E-09            | 2.7E-11       |
| Clone1     | S     | H        | 906              | 2.51E+09 | 0.46 | 0.05 | 106.6             | 3.7E-07            | 3.5E-09       |
| Clone2     | S     | H        | 876              | 2.62E+09 | 0.46 | 0.05 | 106.6             | 3.5E-07            | 3.2E-09       |
| Clone3     | S     | H        | 349              | 2.45E+09 | 0.46 | 0.05 | 106.6             | 1.5E-07            | 1.4E-09       |
| h24        | S     | H        | 574              | 1.65E+09 | 0.39 | 0.33 | 106.6             | 3.0E-07            | 2.8E-09       |
| h25        | S     | H        | 562              | 1.47E+09 | 0.47 | 0.27 | 106.6             | 3.0E-07            | 2.8E-09       |
| h2c        | S     | H        | 651              | 2.52E+09 | 0.46 | 0.05 | 106.6             | 2.7E-07            | 2.5E-09       |
| hdfcon1    | S     | H        | 391              | 1.08E+09 | 0.43 | 0.3  | 106.6             | 3.0E-07            | 2.8E-09       |
| hdfcon2    | S     | H        | 299              | 1.03E+09 | 0.43 | 0.3  | 106.6             | 2.4E-07            | 2.2E-09       |
| hdf2       | S     | H        | 360              | 1.73E+09 | 0.43 | 0.3  | 106.6             | 1.7E-07            | 1.6E-09       |
| hdf3       | S     | H        | 534              | 1.60E+09 | 0.43 | 0.3  | 106.6             | 2.7E-07            | 2.6E-09       |
| BM1452.001 | G     | H        | 62               | 2.08E+09 | 1    | 0.25 | 425.1             | 1.1E-08            | 2.6E-11       |
| BM1453.001 | G     | H        | 50               | 2.16E+09 | 1    | 0.25 | 586.1             | 8.7E-09            | 1.5E-11       |

\* S=somatic; G=germline

† M=mouse; H=human

¶ TPR (sensitivity) for single cells, TPR is estimated using a kindred cell and clone combination (Dong et al., accepted); for germline, TPR is approximated as 1 because we found almost no Mendelian inheritance errors

‡ FDR (false discovery rate) is approximated using both Sanger sequencing and kindred samples

22  
23  
24

**Supplementary Table 5.**  
**Germline SNPs called and**  
**missed by VarScan**

| Sample         | Species | Total   | Missed | Sensitivity | Type        |
|----------------|---------|---------|--------|-------------|-------------|
| mb-ice1        | Mouse   | 60402   | 10228  | 83.07%      | Single cell |
| mb-ice2        | Mouse   | 53542   | 12423  | 76.80%      | Single cell |
| mb-ice3        | Mouse   | 53749   | 10147  | 81.12%      | Single cell |
| mb-mdfcon1     | Mouse   | 59044   | 9875   | 83.28%      | Single cell |
| mb-mdfcon2     | Mouse   | 48373   | 9059   | 81.27%      | Single cell |
| hunamp-clone1  | Human   | 2116163 | 30921  | 98.54%      | Clone       |
| hunamp-clone2  | Human   | 2193044 | 32252  | 98.53%      | Clone       |
| hunamp-clone3  | Human   | 2056154 | 29411  | 98.57%      | Clone       |
| hunamp-h2c     | Human   | 1982400 | 39157  | 98.02%      | Clone       |
| hunamp-h24     | Human   | 1208695 | 63030  | 94.79%      | Single cell |
| hunamp-h25     | Human   | 1089932 | 259466 | 76.19%      | Single cell |
| hunamp-hdfcon1 | Human   | 725396  | 56484  | 92.21%      | Single cell |
| hunamp-hdfcon2 | Human   | 662951  | 40499  | 93.89%      | Single cell |
| hunamp-hdf2    | Human   | 1305829 | 47187  | 96.39%      | Single cell |
| hunamp-hdf3    | Human   | 1166095 | 233600 | 79.97%      | Single cell |

25  
26
